# Supplementary material
Source: ML conference proceedings conference paper supplement (https://openaccess.thecvf.com/content/ICCV_2017/html/Park_RDFNet_RGB-D_Multi-Level_ICCV_2017_paper.html)
Supplement: Supplementary file 1 [file Park_RDFNet_RGB-D_Multi-Level_ICCV_2017_supplemental.pdf]

# Supplementary Material

## RDFNet: RGB-D Multi-level Residual Feature Fusion for Indoor Semantic Segmentation

Seong-Jin Park  
POSTECH

Ki-Sang Hong  
POSTECH

Seungyong Lee  
POSTECH

{windray, hongks, leesy}@postech.ac.kr

### 1. Additional Qualitative Results

#### 1.1. Qualitative results of our RDFNet-101 compared with those of RefineNet-101 [1]

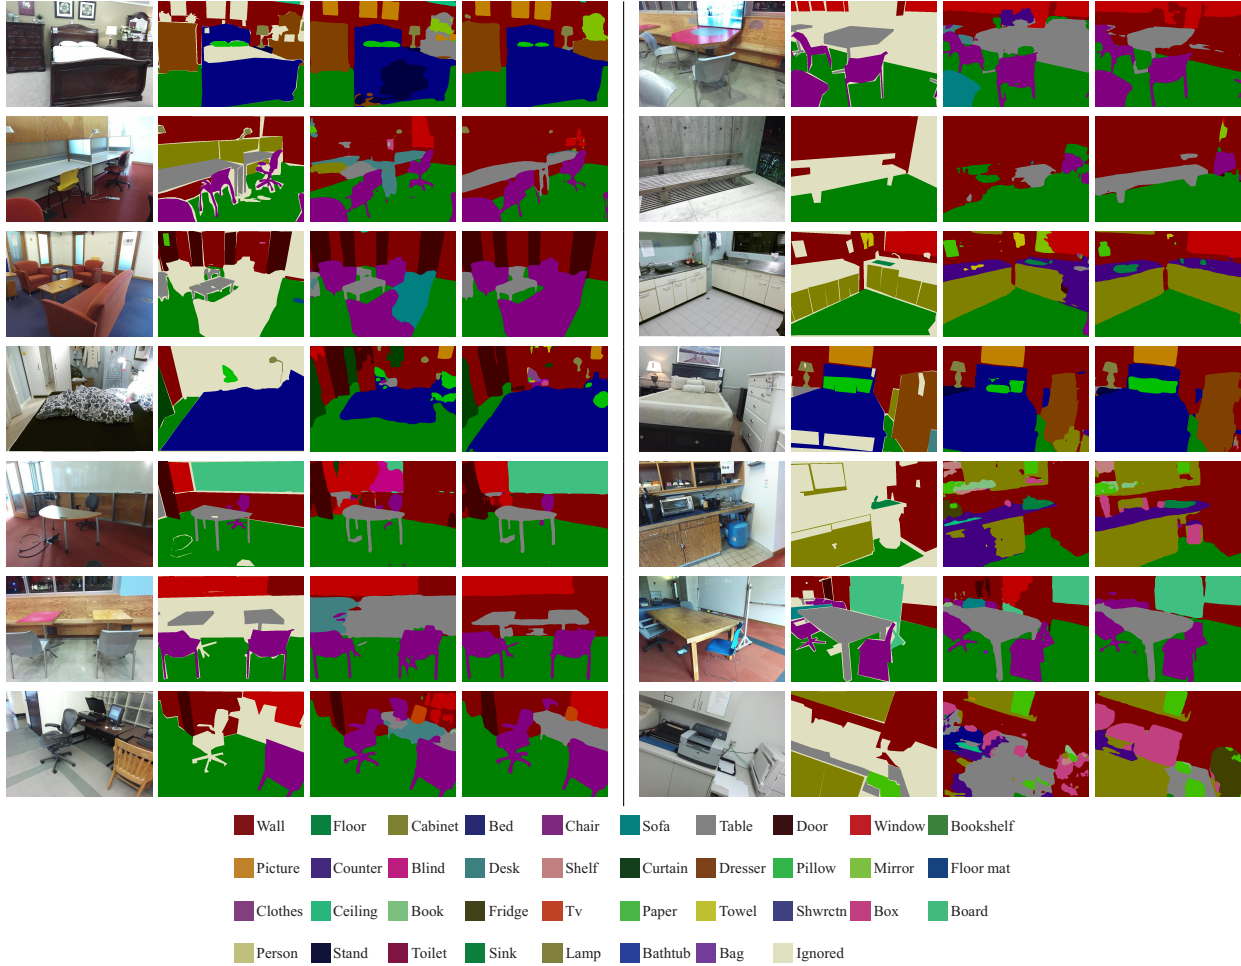

Figure 1: Qualitative results of our RDFNet-101 compared with those of RefineNet-101. From left to right for each example: image, ground truth, the results obtained by RefineNet and ours.

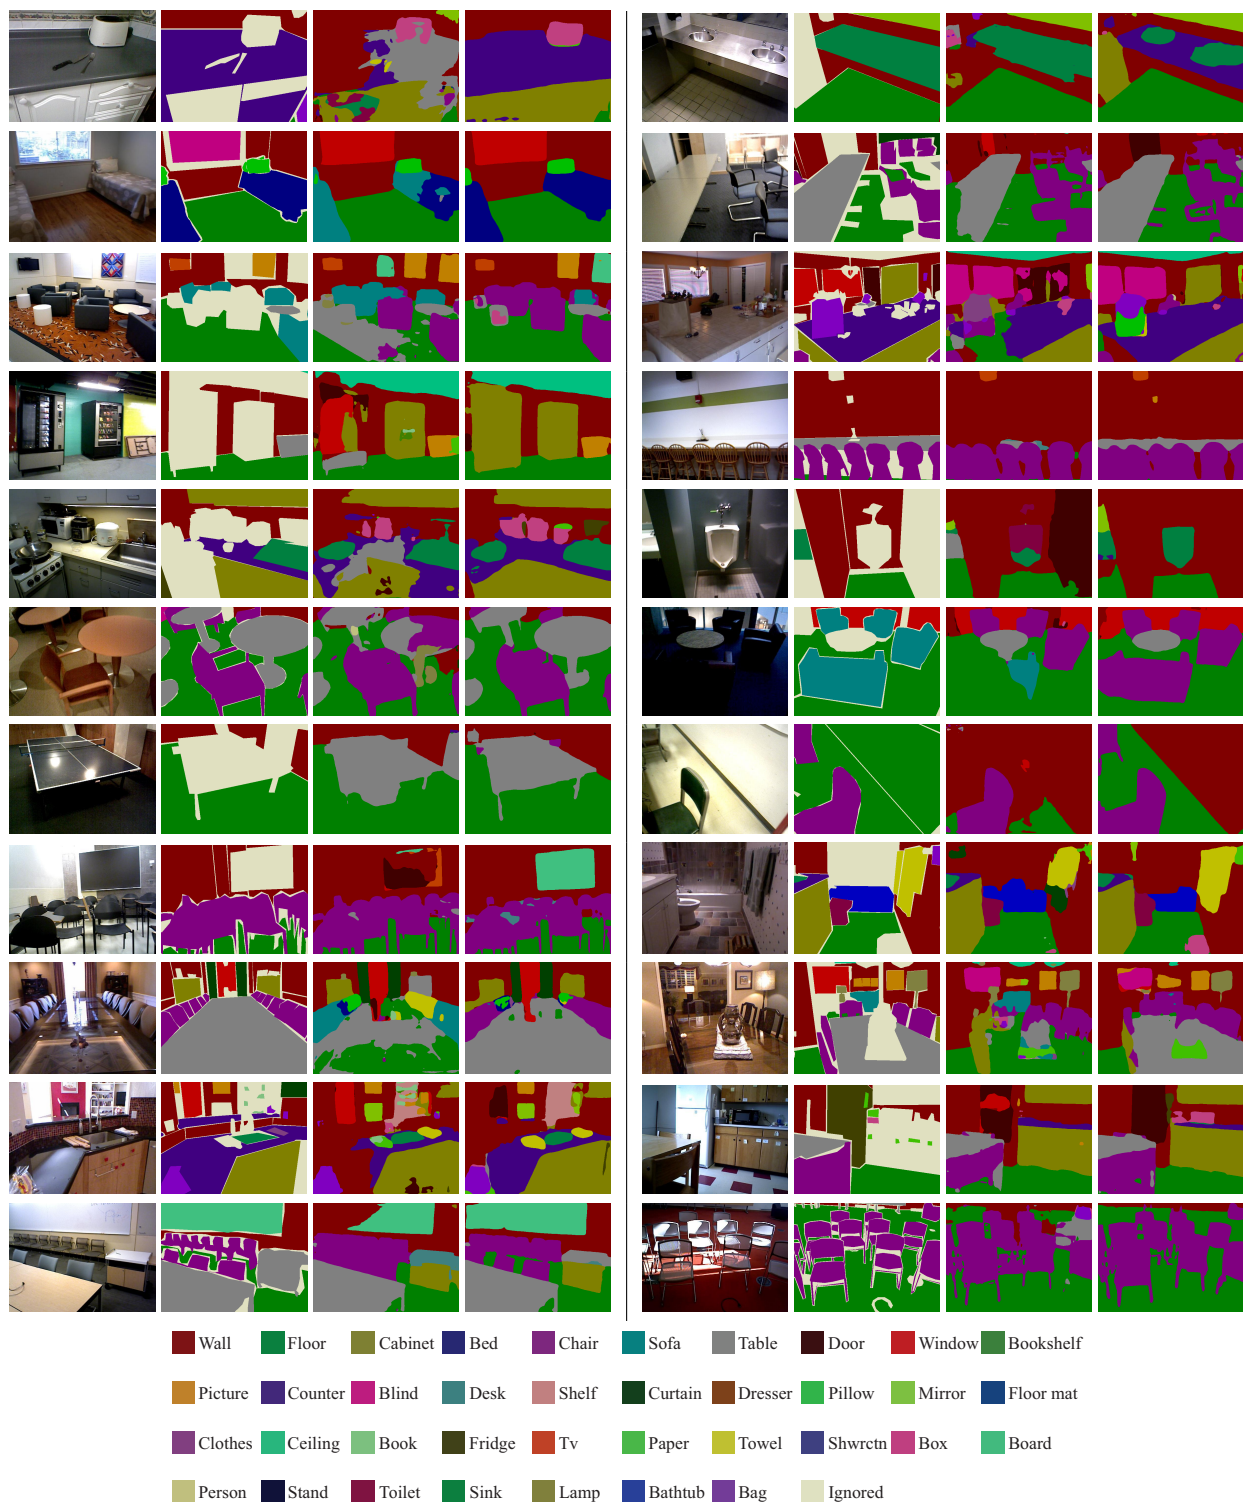

Figure 2: Qualitative results of our RDFNet-101 compared with those of RefineNet-101 (cont.). From left to right for each example: image, ground truth, the results obtained by RefineNet and ours.

## 1.2. Qualitative results of our RDFNet-152

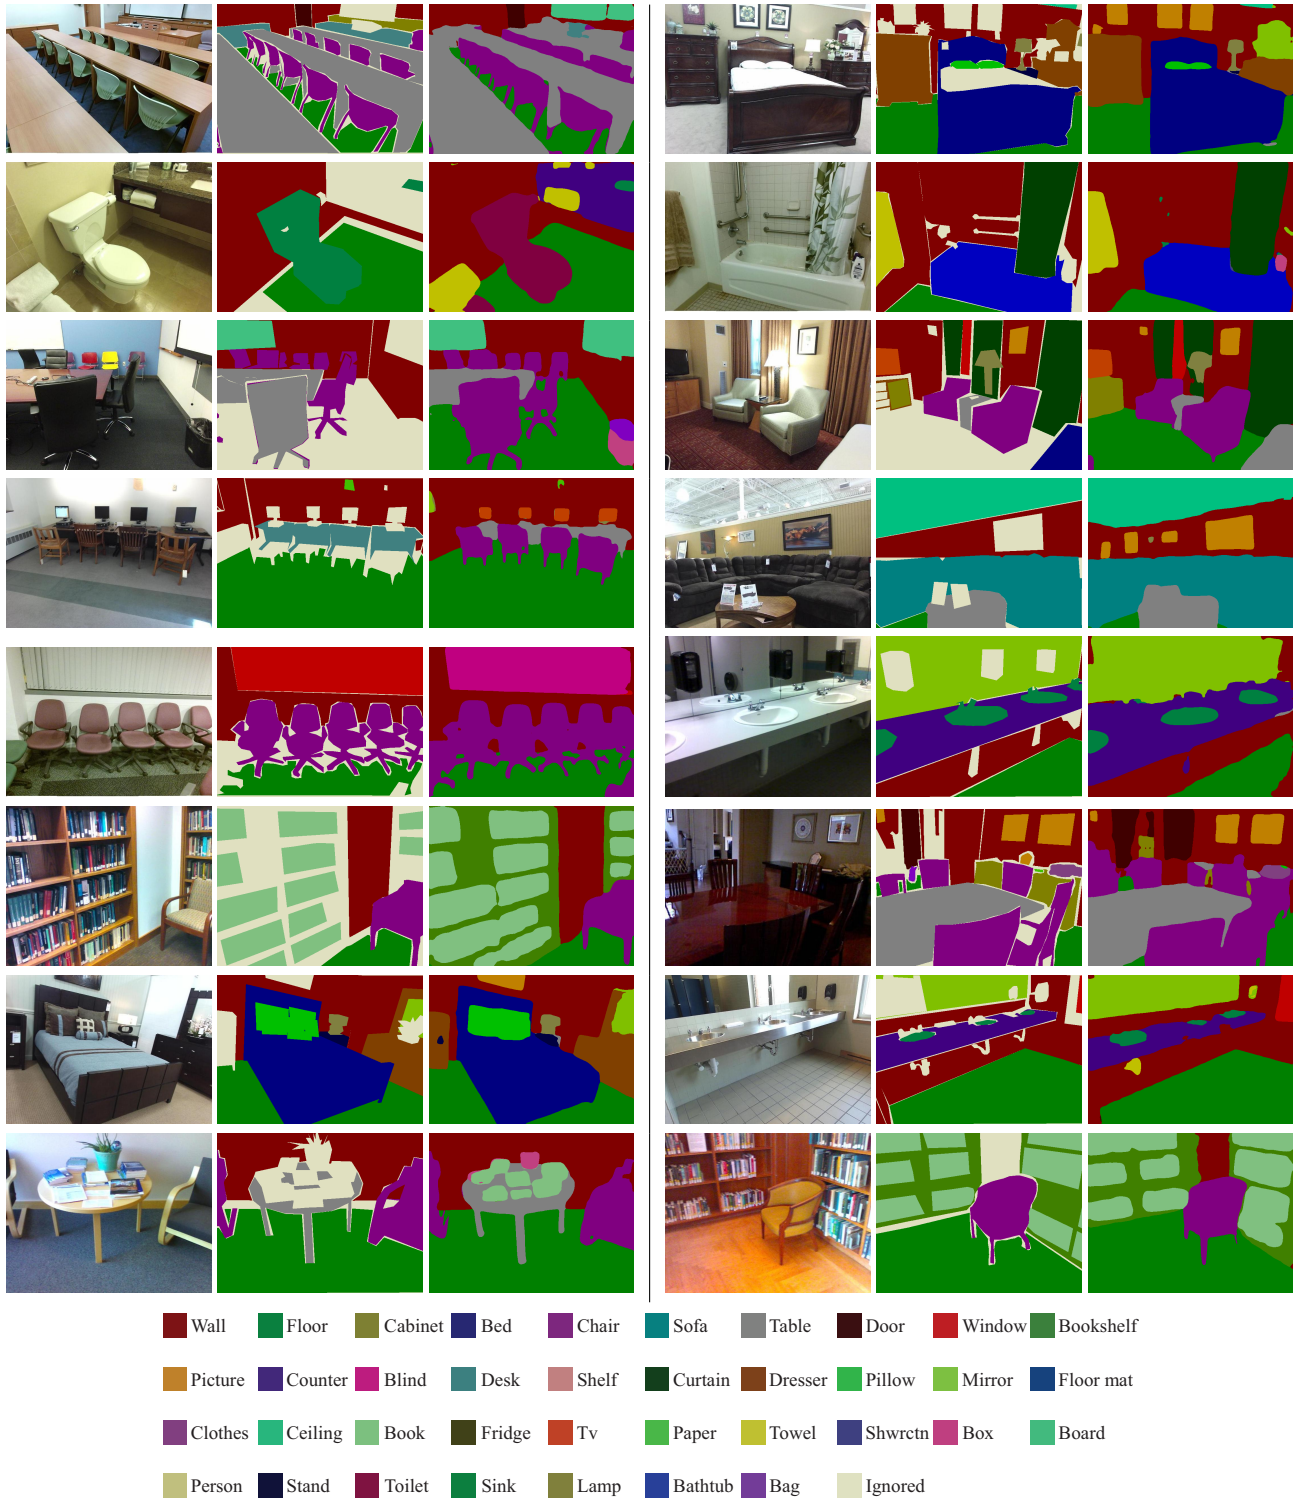

Figure 3: Qualitative results of our RDFNet-152. From left to right for each example: image, ground truth, and our result.

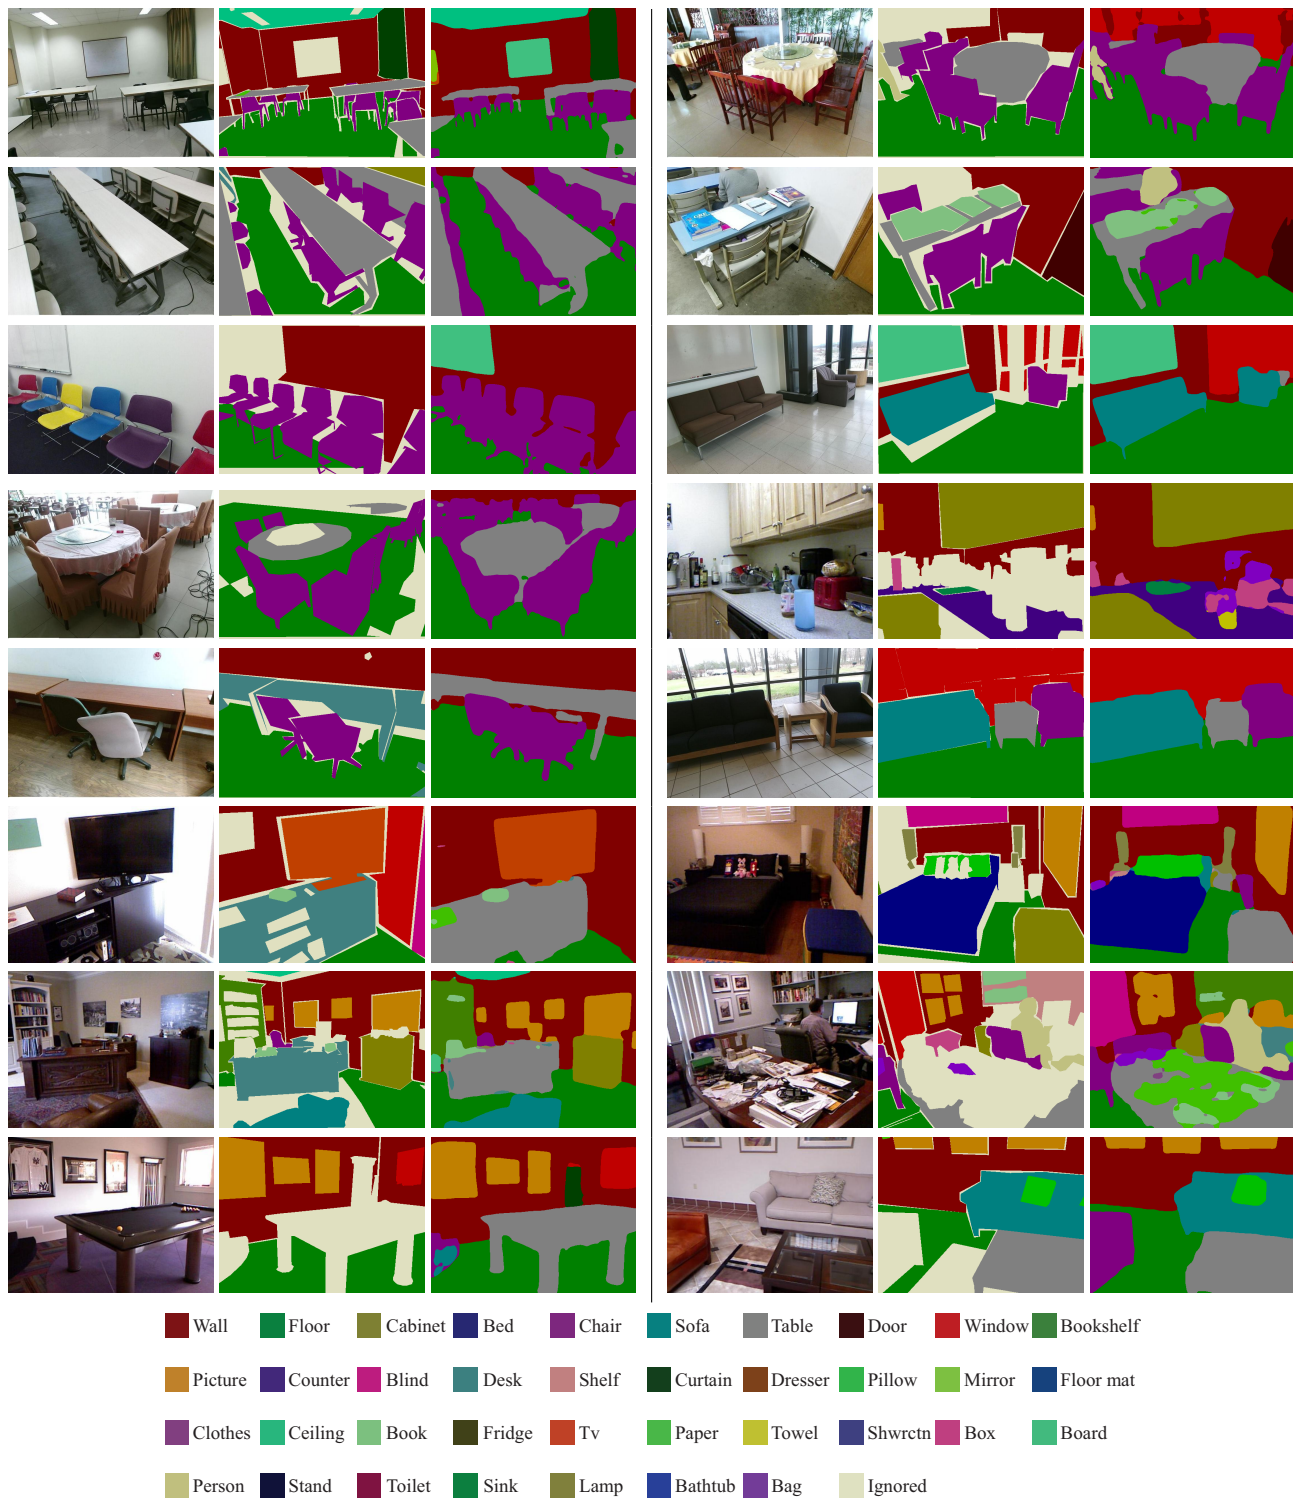

Figure 4: Qualitative results of our RDFNet-152 (cont.). From left to right for each example: image, ground truth, and our result.



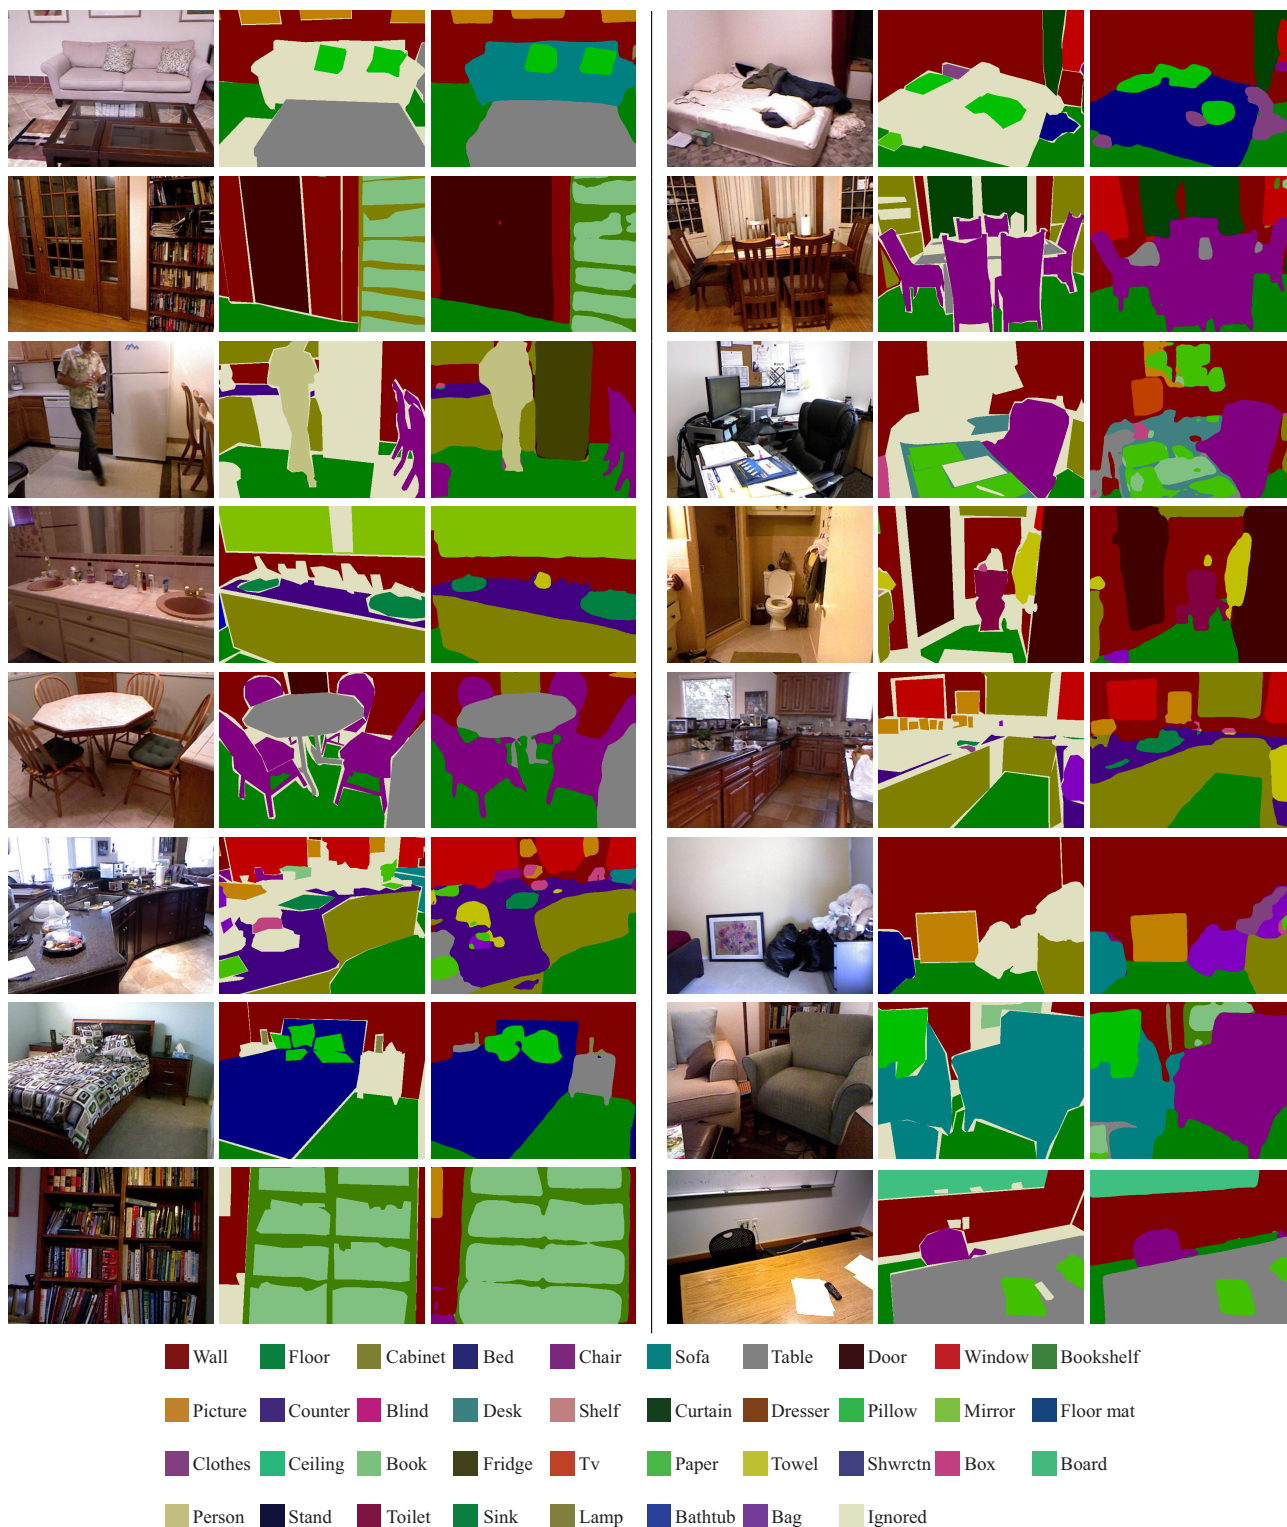

Figure 5: Qualitative results of our RDFNet-152 (cont.). From left to right for each example: image, ground truth, and our result.

## References

- [1] G. Lin, A. Milan, C. Shen, and I. Reid. RefineNet: Multi-path refinement networks for high-resolution semantic segmentation. In *CVPR*, July 2017. [1](#)
